# Supplementary material for: Interface Engineering via Ti3C2Tx MXene Electrolyte Additive toward Dendrite-Free Zinc Deposition
Source: PubMed Central journal article supplement (PMC8006525; doi:10.1007/s40820-021-00612-8), 2021-03-08
Supplement: 40820_2021_612_MOESM1_ESM.pdf [file 40820_2021_612_MOESM1_ESM.pdf]

Supporting Information for

# Interface Engineering via $\text{Ti}_3\text{C}_2\text{T}_x$ MXene Electrolyte Additive towards Dendrite-Free Zinc Deposition

Chuang Sun<sup>1,+</sup>, Cuiping Wu<sup>1,+</sup>, Xingxing Gu<sup>2,3,\*</sup>, Chao Wang<sup>1,\*</sup>, Qinghong Wang<sup>1,\*</sup><sup>1</sup> School of Chemistry and Materials Science, Jiangsu Normal University, Xuzhou, Jiangsu 221116, P. R. China<sup>2</sup> Faculty of Engineering and Environment, Northumbria University, Newcastle upon Tyne NE1 8ST, UK<sup>3</sup> Chongqing Key Laboratory of Catalysis and New Environmental Materials, College of Environment and Resources, Chongqing Technology and Business University, Chongqing 400067, P. R. China

+Chuang Sun and Cuiping Wu contributed equally to this work

\*Corresponding authors. E-mail: [x.gu@ctbu.edu.cn](mailto:x.gu@ctbu.edu.cn) or [xingxing.gu@northumbria.ac.uk](mailto:xingxing.gu@northumbria.ac.uk) (Xingxing Gu), [wangc@jsnu.edu.cn](mailto:wangc@jsnu.edu.cn) (Chao Wang), [wangqh@jsnu.edu.cn](mailto:wangqh@jsnu.edu.cn) (Qinghong Wang)

## Supplementary Figures and Tables

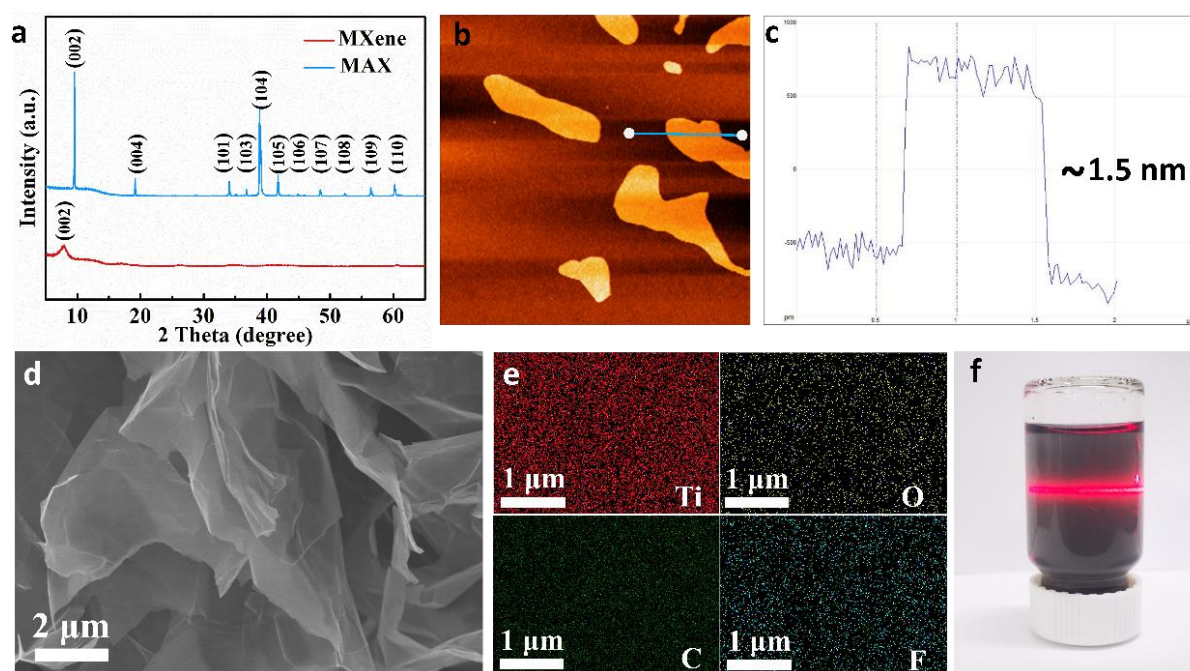

**Fig. S1** Characterization of the as-prepared  $\text{Ti}_3\text{C}_2\text{T}_x$  MXene: **a** XRD pattern, **b**, **c** AFM images, **d** SEM image, **e** EDS mapping and **f** Tyndall effect of MXene concentration of  $0.05 \text{ mg mL}^{-1}$  for electrolyte additive

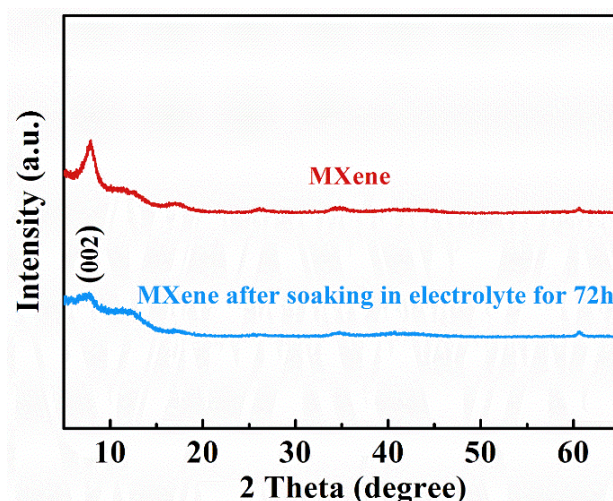

Fig. S2 XRD pattern of MXene before and after soaking in electrolyte for 72 h

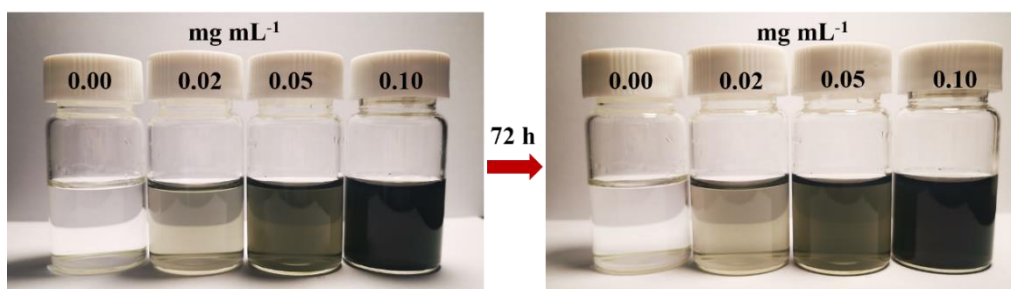

Fig. S3 Photos of the freshly prepared MXene added ZSO electrolytes and those rested for 72 h

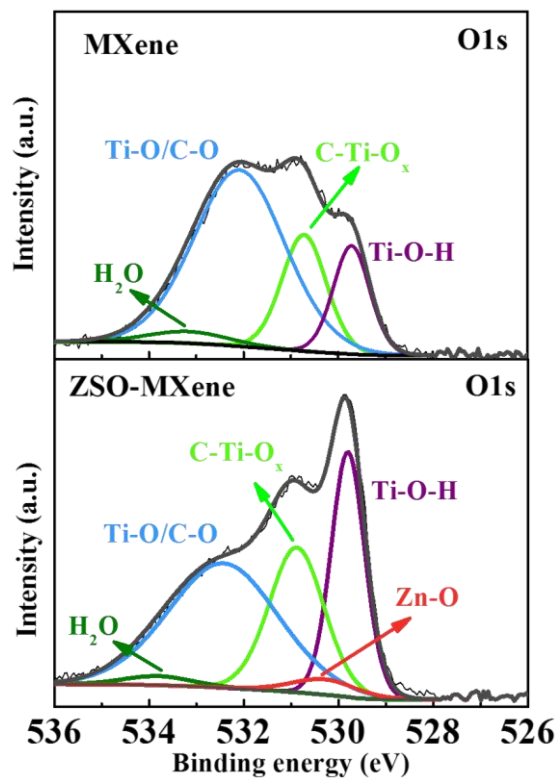

Fig. S4 Comparison of high resolution XPS spectra of pristine MXene and MXene after soaking in ZSO electrolyte in the O 1s region

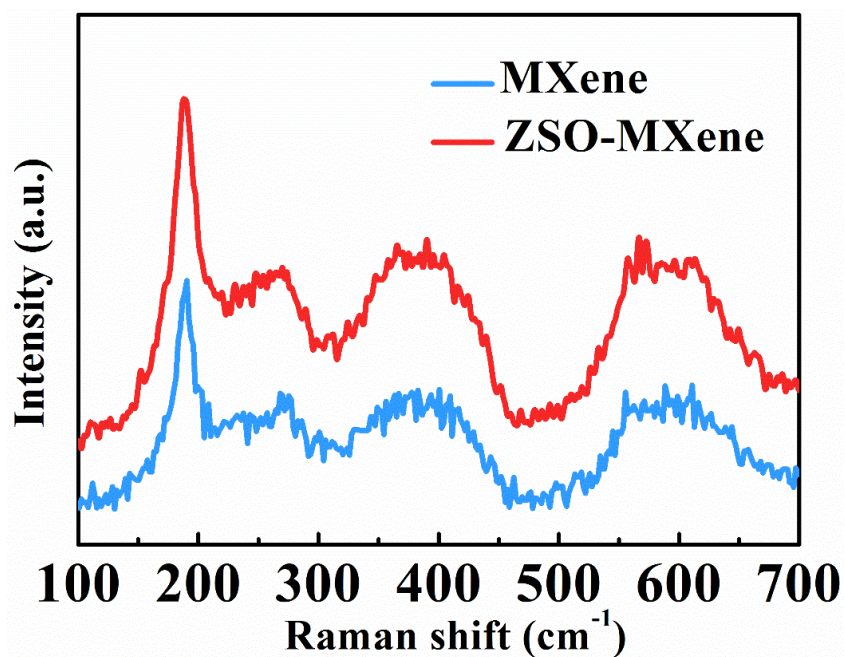

**Fig. S5** Comparison of Raman of pristine MXene and MXene after soaking in ZSO electrolyte

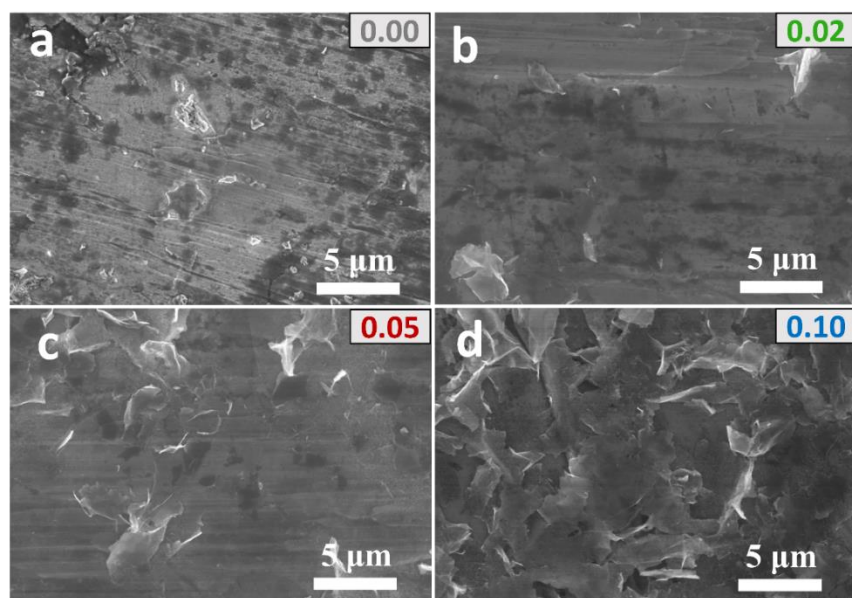

**Fig. S6** Surface SEM images of Zn foil immersed in electrolyte with different concentration of MXene additives for 4 h: **a** 0 mg mL<sup>-1</sup>, **b** 0.02 mg mL<sup>-1</sup>, **c** 0.05 mg mL<sup>-1</sup>, and **d** 0.10 mg mL<sup>-1</sup>

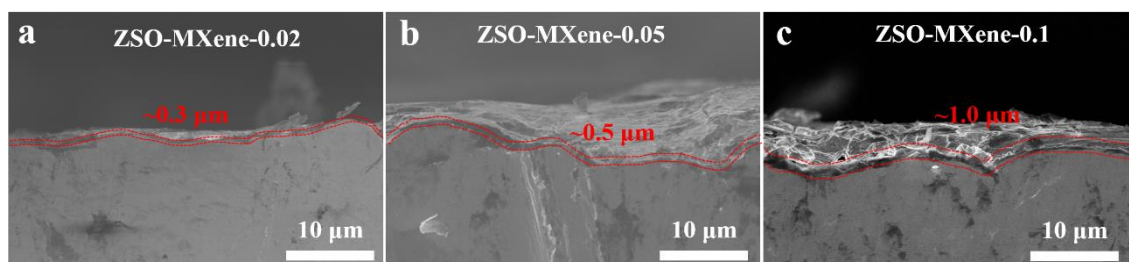

**Fig. S7** Sectional SEM images of Zn foil immersed in electrolyte with different concentration of MXene additives for 4 h: **a** 0.02 mg mL<sup>-1</sup>, **b** 0.05 mg mL<sup>-1</sup>, and **c** 0.10 mg mL<sup>-1</sup>

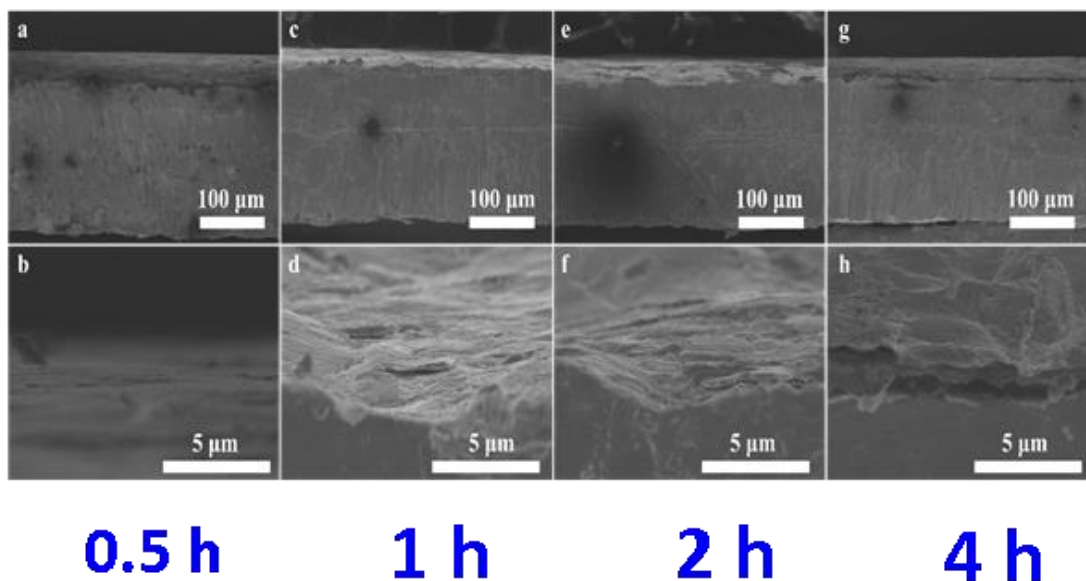

**Fig. S8** Cross-sectional SEM images of Zn foil immersed in electrolyte with concentration of  $0.05 \text{ mg mL}^{-1}$  MXene additives for **a, b** 0.5 h, **c, d** 1 h, **e, f** 2 h, and **g, h** 4 h

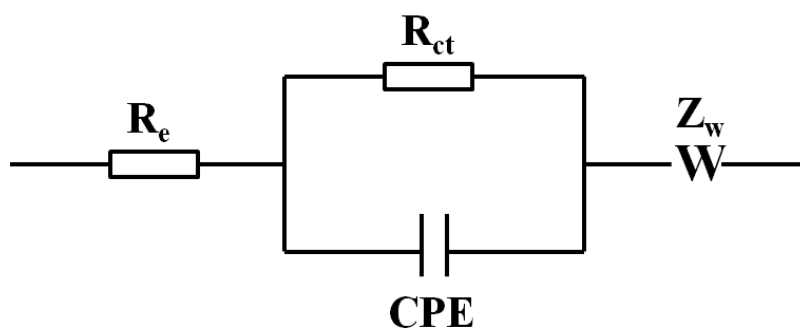

**Fig. S9** The equivalent circuit

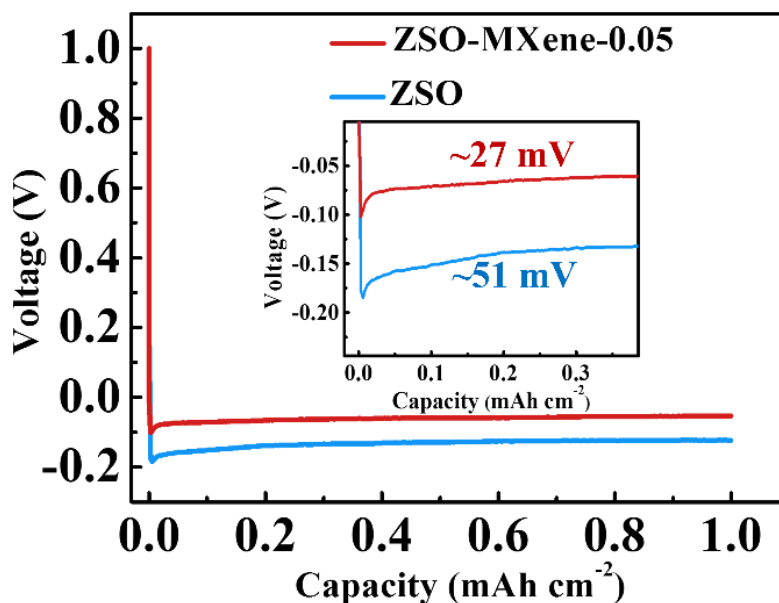

**Fig. S10** Zn plating curves in electrolytes of ZSO-MXene-0.05 and ZSO at the current density of  $2 \text{ mA cm}^{-2}$  with the capacity limited to  $1 \text{ mAh cm}^{-2}$

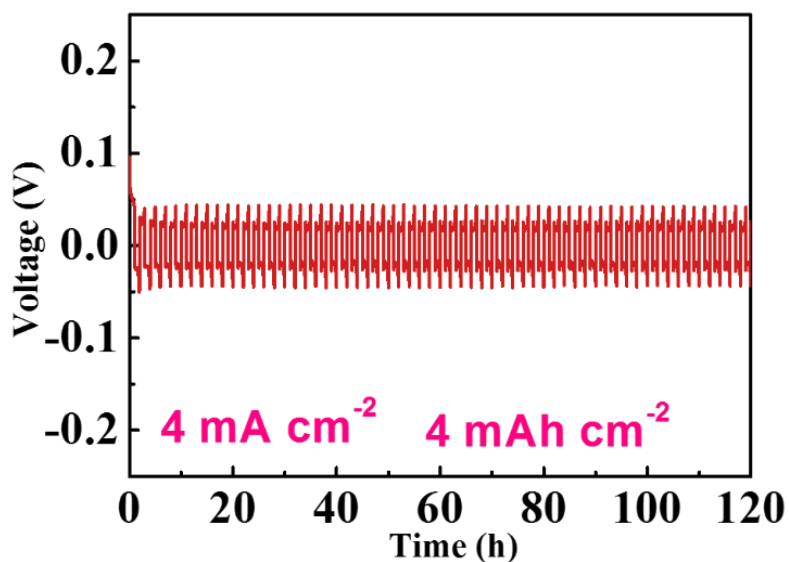

**Fig. S11** Long-term galvanostatic cycling of Zn-Zn symmetrical cell at 4 mA cm<sup>-2</sup> with 4 mAh cm<sup>-2</sup>

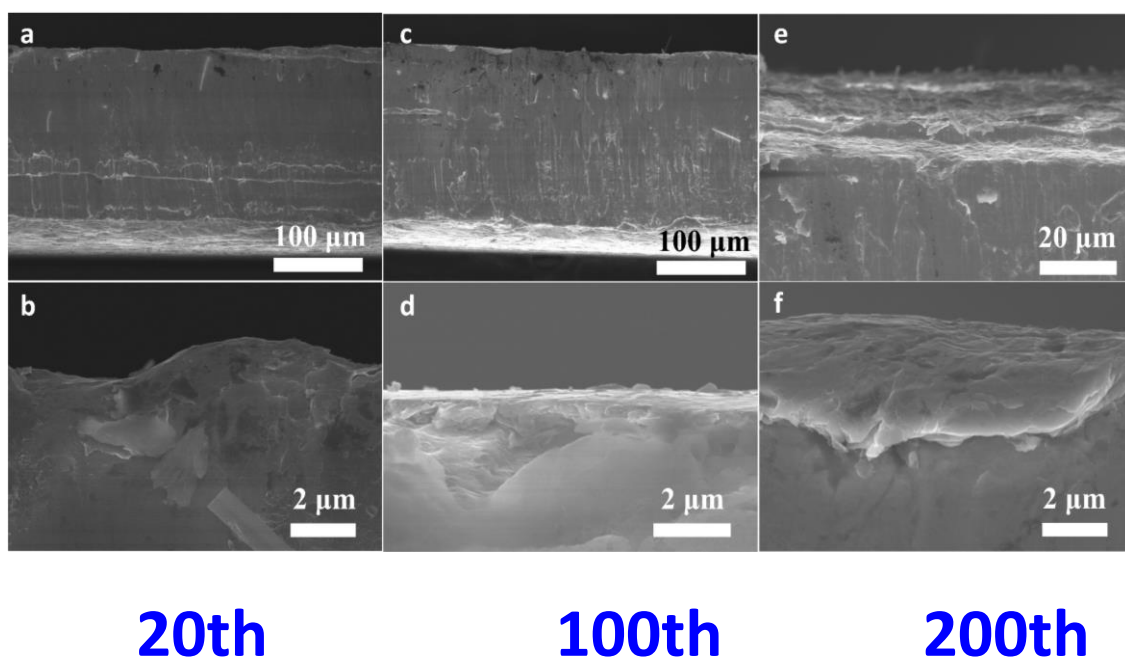

**Fig. S12** The cross-sectional configuration of Zn anode after cycling in ZSO-MXene-0.05 electrolyte at current density of 2 mA cm<sup>-2</sup> with 1 mAh cm<sup>-2</sup> Zn plating/stripping: **a, b** after 20 cycles, **c, d** after 100 cycles and **e, f** after 200 cycles

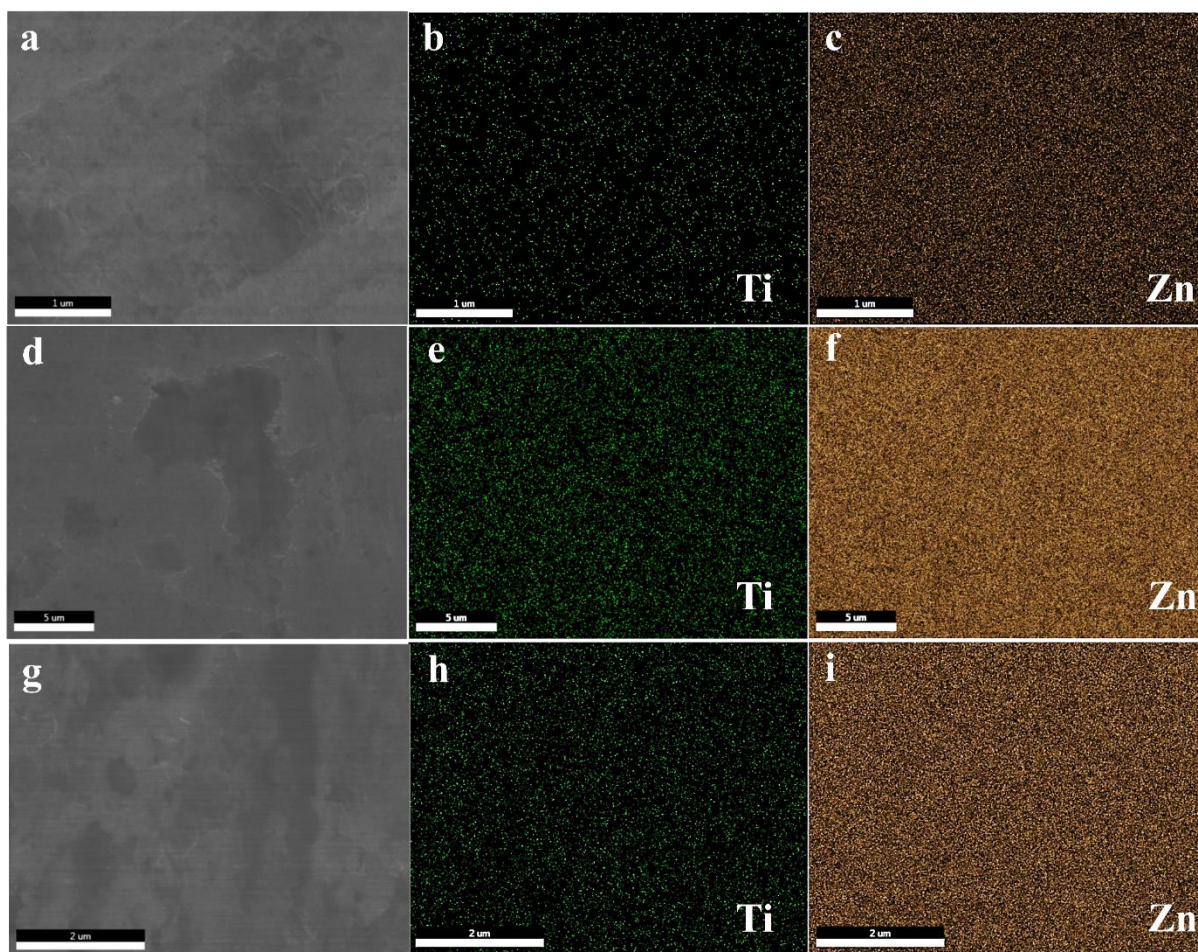

**Fig. S13** Surface configuration of Zn anode after cycling in ZSO-MXene-0.05 electrolyte for different cycles and the corresponding EDS mapping results: **a-c** 20 cycles, **d-f** 100 cycles, and **g-i** 200 cycles

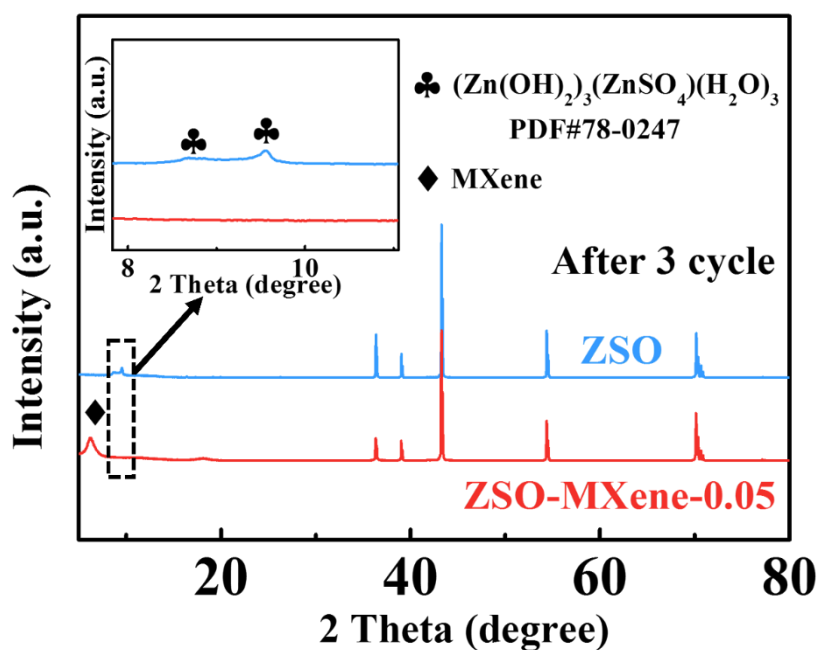

**Fig. S14** XRD measurement of cycled Zn anode in the ZSO and ZSO-MXene-0.05 electrolytes

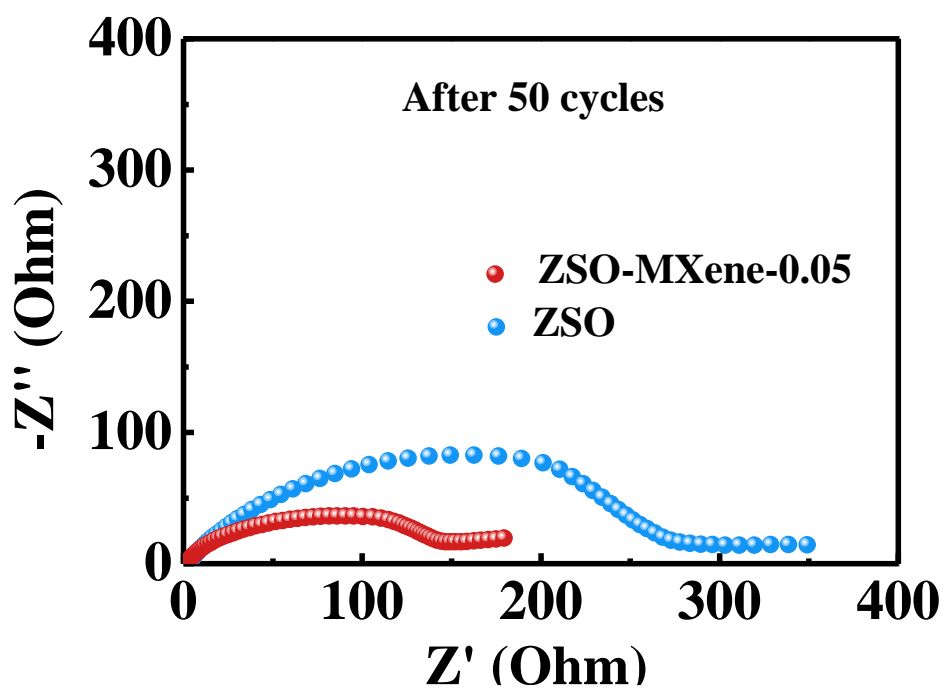

Fig. S15 EIS of Zn-Zn symmetrical cells in ZSO and ZSO-MXene-0.05 electrolyte after charge-discharged for 50 cycles

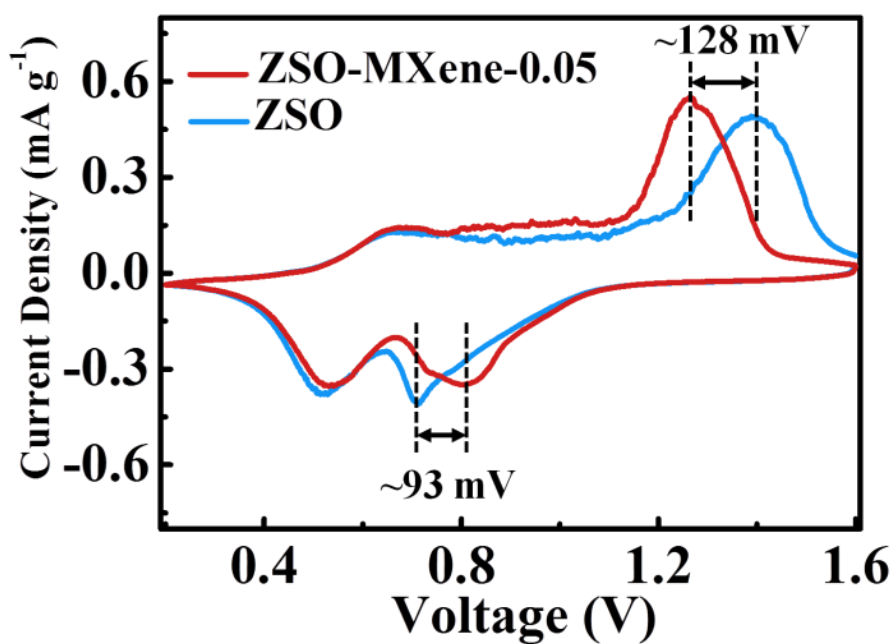

Fig. S16 CV curves of the Zn-V<sub>2</sub>O<sub>5</sub> full cells in ZSO and ZSO-MXene-0.05 electrolyte

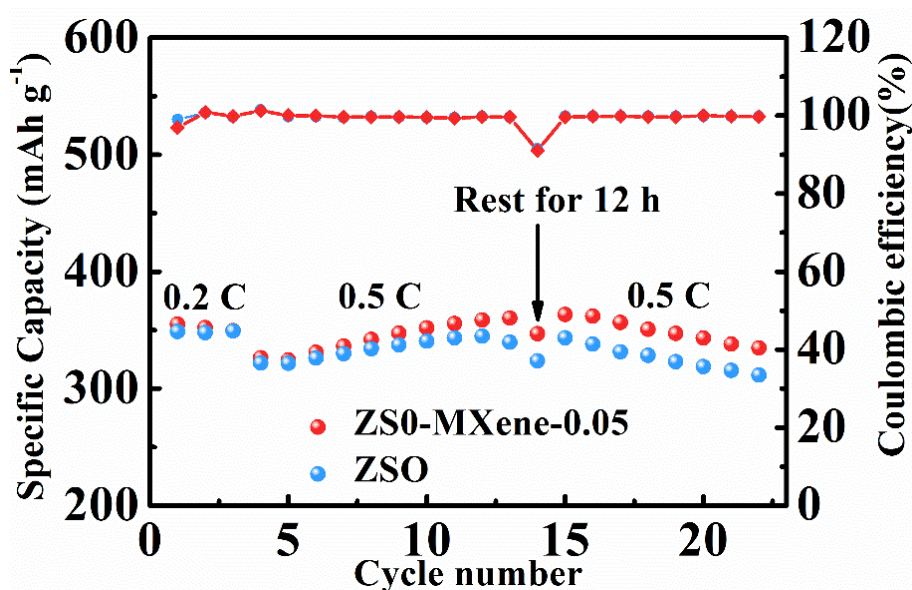

Fig. S17 Self-discharge behavior of Zn full cells

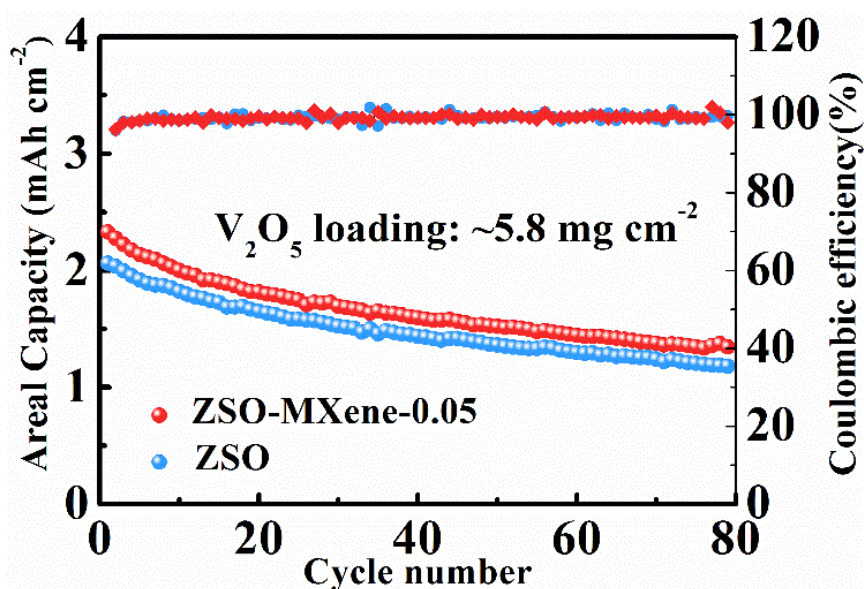

Fig. S18 Long-term cycling performance of Zn-V<sub>2</sub>O<sub>5</sub> full cells in high mass loading

Table S1 Fitting results of the Nyquist plots of Zn-Zn cells in electrolytes with different MXene additives

| Concentration           | $R_{ct}$ ( $\Omega$ ) |
|-------------------------|-----------------------|
| Blank ZnSO <sub>4</sub> | 1042.5                |
| ZSO-MXene-0.02          | 725.3                 |
| ZSO-MXene-0.05          | 715.2                 |
| ZSO-MXene-0.10          | 767.9                 |



**Table S2** Cycling performances comparison for various Zn anodes

| Strategies/Anode materials                                               | Lifespan                                                                                                                                                                                | Refs.                                               |
|--------------------------------------------------------------------------|-----------------------------------------------------------------------------------------------------------------------------------------------------------------------------------------|-----------------------------------------------------|
| 20 m LiTFSI+1 m Zn(TFSI)/Zinc power                                      | 170 h (0.2 mA cm <sup>-2</sup> , 0.035 mAh cm <sup>-2</sup> )                                                                                                                           | <i>Nat. Mater.</i> <b>2018</b> , 17, 543-549        |
| 3 M Zn(CF <sub>3</sub> SO <sub>3</sub> ) <sub>2</sub> /Zinc foil         | 800 h (0.1 mA cm <sup>-2</sup> , 0.1mAh cm <sup>-2</sup> )                                                                                                                              | <i>J. Am. Chem. Soc.</i> <b>2016</b> , 138, 12894   |
| 3.3 M ZnSO <sub>4</sub> /MOF-coated Zn foils                             | 1300 h (0.3 mA cm <sup>-2</sup> , 0.3mAh cm <sup>-2</sup> )                                                                                                                             | <i>Angew. Chem.</i> <b>2020</b> , 59, 9377          |
| N-doped carbon coated zinc foil                                          | 400 h (2 mA cm <sup>-2</sup> , 2 mAh cm <sup>-2</sup> )                                                                                                                                 | <i>Adv. Energy Mater.</i> <b>2020</b> , 10, 1904215 |
| 3D flexible carbon nanotubes                                             | 200 h (1 mA cm <sup>-2</sup> , 2 mAh cm <sup>-2</sup> )                                                                                                                                 | <i>Adv. Mater.</i> <b>2019</b> , 31, 1903675.       |
| Ti <sub>3</sub> C <sub>2</sub> T <sub>X</sub> MXene@Zn Paper             | 350 h (1 mA cm <sup>-2</sup> , 1 mAh cm <sup>-2</sup> )                                                                                                                                 | <i>ACS Nano</i> <b>2019</b> , 13, 11676             |
| PAM/Zinc plated copper mesh                                              | 350 h (0.2 mA cm <sup>-2</sup> , 1 mAh cm <sup>-2</sup> )                                                                                                                               | <i>Angew. Chem.</i> <b>2019</b> , 58, 15841.        |
| Triethyl phosphate electrolyte/zinc foil                                 | 600 h (0.8 mA cm <sup>-2</sup> , 0.8 mAh cm <sup>-2</sup> )                                                                                                                             | <i>Angew. Chem.</i> <b>2019</b> , 58, 2760          |
| Diethyl ether additive/zinc foil                                         | 250 h (0.2 mA cm <sup>-2</sup> , 0.2 mAh cm <sup>-2</sup> )                                                                                                                             | <i>Nano Energy.</i> <b>2019</b> , 62, 275           |
| Nanoporous CaCO <sub>3</sub> -coated zinc anode                          | 836 h (0.25 mA cm <sup>-2</sup> , 0.05 mAh cm <sup>-2</sup> )                                                                                                                           | <i>Adv. Energy Mater.</i> <b>2018</b> , 8, 1801090. |
| <b>Ti<sub>3</sub>C<sub>2</sub>T<sub>X</sub> MXene additive/Zinc foil</b> | <b>500 h (1 mA cm<sup>-2</sup>, 1 mAh cm<sup>-2</sup>)</b><br><b>1180 h (2 mA cm<sup>-2</sup>, 1 mAh cm<sup>-2</sup>)</b><br><b>250 h (4 mA cm<sup>-2</sup>, 1 mAh cm<sup>-2</sup>)</b> | <b>This work</b>                                    |

**Table S3** Comparison for electrochemical performances of Zn-V<sub>2</sub>O<sub>5</sub> cells

| Cathode materials                                | Discharge capacity                                       | Refs.                                                            |
|--------------------------------------------------|----------------------------------------------------------|------------------------------------------------------------------|
| V <sub>2</sub> O <sub>5</sub> ·nH <sub>2</sub> O | 381 mA h g <sup>-1</sup> (60 mA g <sup>-1</sup> )        | <i>Adv. Mater.</i> <b>2018</b> , 30, 1703725                     |
| V <sub>2</sub> O <sub>5</sub>                    | 242 mA h g <sup>-1</sup> (50 mA g <sup>-1</sup> )        | <i>Chem. Commun.</i> <b>2018</b> , 54, 4457–4460.                |
| V <sub>2</sub> O <sub>5</sub>                    | 372 mA h g <sup>-1</sup> (300 mA g <sup>-1</sup> )       | <i>ACS Appl. Mater. Interfaces</i> <b>2017</b> , 9, 42717–42722. |
| V <sub>2</sub> O <sub>5</sub>                    | 196 mA h g <sup>-1</sup> (14.4 mA g <sup>-1</sup> )      | <i>Adv. Energy Mater.</i> <b>2016</b> , 6, 1600826               |
| V <sub>2</sub> O <sub>5</sub>                    | 282 mA h g <sup>-1</sup> (300 mA g <sup>-1</sup> )       | <i>Nat Energy.</i> <b>2016</b> , 1,16119                         |
| V <sub>2</sub> O <sub>5</sub>                    | 340 mA h g <sup>-1</sup> (200 mA g <sup>-1</sup> )       | <i>Angew. Chem.</i> <b>2018</b> , 57, 3943.                      |
| V <sub>2</sub> O <sub>5</sub>                    | 373 mA h g <sup>-1</sup> (200 mA g <sup>-1</sup> )       | <i>Adv. Energy Mater.</i> <b>2018</b> , 8, 1702463               |
| <b>V<sub>2</sub>O<sub>5</sub></b>                | <b>390.9 mA h g<sup>-1</sup> (200 mA g<sup>-1</sup>)</b> | <b>This work</b>                                                 |
